# Supplementary material
Source: Springer Nature journal article supplement (https://www.springermedizin.de/resource/supplementary/13049_2009_150_MOESM2_ESM.pdf/9666112)
Supplement: MOESM2 [file 9666112]

Received  
AMIS-forms  
**5 738**

Search and  
rescue mission  
**4**

Duplicates  
**71**

Medical training  
exercise  
**25**

Not red  
response  
**480**

Outside  
catchment area  
**53**

Amis forms  
included  
**5 105**

With additional  
medical records  
**4 551 (89%)**

Without additional  
medical records  
**554 (11%)**
